# Supplementary material for: Facile synthesis of porous hybrid materials based on Calix-3 dye and TiO2 for high photocatalytic water splitting performance with excellent stability
Source: Royal Society of Chemistry journal article supplement (doi:10.1039/c8ta10633a), 2019-01-01
Supplement: c8ta10633a1.pdf [file c8ta10633a1.pdf]

## Supporting Information

### **Facile synthesis of porous hybrid materials based on Calix-3 dye and TiO<sub>2</sub> for high photocatalytic water splitting performance with excellent stability**

Jian-Feng Huang<sup>a</sup>, Jun-Min Liu<sup>a,\*</sup>, Li-Min Xiao<sup>b</sup>, Yu-Hui Zhong<sup>a</sup>, Liang Liu<sup>a</sup>, Su Qin<sup>a</sup>,  
Jing Guo<sup>a</sup>, Cheng-Yong Su<sup>a</sup>

<sup>a</sup>School of Materials Science and Engineering and School of Chemistry, Sun Yat-sen University, Guangzhou, 510275, China. <sup>b</sup>School of Computer Science and Engineering, Beihang University, Beijing, 100191, China. Correspondence and requests for materials should be addressed to J.M.L. (\*e-mail: liujunm@mail.sysu.edu.cn)

## Table of Contents

|                                                                                                                                                                                                                                                               |           |
|---------------------------------------------------------------------------------------------------------------------------------------------------------------------------------------------------------------------------------------------------------------|-----------|
| <b>1. Materials and Methods</b> .....                                                                                                                                                                                                                         | <b>3</b>  |
| <b>2. Fig. S1.</b> N <sub>2</sub> adsorption-desorption isotherms of Calix-3-TiO <sub>2</sub> (5 wt%), Gel-TiO <sub>2</sub> and P25-TiO <sub>2</sub> measured under 77 K.....                                                                                 | <b>7</b>  |
| <b>3. Fig. S2.</b> The pore size distribution of A) Calix-3-TiO <sub>2</sub> (5 wt%) and B) Gel-TiO <sub>2</sub> .....                                                                                                                                        | <b>7</b>  |
| <b>4. Table S1.</b> BET surface area, pore volume and pore width of Calix-3-TiO <sub>2</sub> (5 wt%), Gel-TiO <sub>2</sub> and P25-TiO <sub>2</sub> derived from 77 K N <sub>2</sub> sorption isotherms.....                                                  | <b>8</b>  |
| <b>5. Fig. S3.</b> EDX of Pt/Calix-3-TiO <sub>2</sub> (5 wt%).....                                                                                                                                                                                            | <b>8</b>  |
| <b>6. Fig. S4.</b> ATR-IR spectra of <b>Calix-3</b> and Calix-3-TiO <sub>2</sub> (7.5 wt%).....                                                                                                                                                               | <b>9</b>  |
| <b>7. Table S2.</b> H <sub>2</sub> production data of Pt/Calix-3-TiO <sub>2</sub> with different dye content, Pt/Gel-TiO <sub>2</sub> /Calix-3 (2.87 wt%), and Pt/P25-TiO <sub>2</sub> /Calix-3 (2.35 wt%) materials.....                                     | <b>9</b>  |
| <b>8. Table S3.</b> Performances of organic photosensitizers in photocatalytic H <sub>2</sub> production studies in recent years.....                                                                                                                         | <b>10</b> |
| <b>9. Table S4.</b> H <sub>2</sub> production and AQY results of Calix-3-TiO <sub>2</sub> after 1 h irradiation under 450 nm LED light source.....                                                                                                            | <b>10</b> |
| <b>10. Table S5.</b> Cyclic H <sub>2</sub> production data of Calix-3-TiO <sub>2</sub> (7.5wt%) hybrid material.....                                                                                                                                          | <b>11</b> |
| <b>11. Fig. S5.</b> Photocatalytic H <sub>2</sub> production over the recyclability of Gel-TiO <sub>2</sub> /Calix-3 (2.87 wt%) with 0.5 wt% Pt loading under visible light irradiation ( $\lambda > 420$ nm) in 100 mL H <sub>2</sub> O/TEOA (9:1, v/v)..... | <b>12</b> |
| <b>12. Fig. S6.</b> Photocatalytic H <sub>2</sub> production over the recyclability of P25-TiO <sub>2</sub> /Calix-3 (2.35 wt%) with 0.5 wt% Pt loading under visible light irradiation ( $\lambda > 420$ nm) in 100 mL H <sub>2</sub> O/TEOA (9:1, v/v)..... | <b>12</b> |
| <b>13. Fig. S7.</b> A) Emission spectra and B) photoluminescence decays of <b>Calix-3</b> , physical-mixing P25-TiO <sub>2</sub> /Calix-3 (5 wt%), and Calix-3-TiO <sub>2</sub> (5 wt%).....                                                                  | <b>13</b> |

## **Materials and Methods**

### **Materials.**

Solvents were purified using an MBRAUN MB SPS-800 system. Anhydrous solvents used in the Suzuki coupling reaction were degassed by bubbling with N<sub>2</sub> for 20 min. All other chemicals and reagents were used as received from commercial sources without further purification. Specifically, butyl titanate (Ti(OBu)<sub>4</sub>) 99.0%, tetrahydrofuran (THF) 99.0%, acetic acid 99.5%, ethanol 99.5%, methanol 99.5%, TEOA 98.0%, H<sub>2</sub>PtCl<sub>6</sub>•6H<sub>2</sub>O 99.95%. The P25-TiO<sub>2</sub> particle is a commercial product of Degussa AG without further treatment. **Calix-3** was prepared according to the method reported in our previous literature.<sup>1</sup>

### **Synthesis of Calix-3-TiO<sub>2</sub> materials.**

Calix-3-TiO<sub>2</sub> hybrid materials were prepared by sol-gel method. Specifically, for 1 wt% Calix-3-TiO<sub>2</sub>, butyl titanate (1 mL), THF (1 mL), acetic acid (168 μL) and distilled water (106 μL) were mixed together in a 20 mL glass sample bottle, then a solution of **Calix-3** (2.5 mg) in THF (1 mL) was added under stirring. The mixture was gently heated on a 50 °C hot plate and turned to be transparent gelatum in a few minutes. The gel was ground out, washed with distilled water in Soxhlet apparatus for 48 h and dried in vacuum to obtain bright orange powder. The other hybrid materials with different **Calix-3** contents and Gel-TiO<sub>2</sub> material were prepared by the same method.

### **Synthesis of Pt/Calix-3-TiO<sub>2</sub> materials.**

Hybrid material (50 mg), distilled water (80 mL), methanol (10 mL) and 10 mM H<sub>2</sub>PtCl<sub>6</sub> aqueous solution (167 μL) were added into a quartz reactor. The mixture was degassed by vacuuming and irradiated with 300 W xeon lamp (without filter) for 30 min, and then the Pt/Calix-3-TiO<sub>2</sub> materials were obtained. Pt loading (0.5 wt%) was testified by the inductively coupled plasma atomic emission spectrometry (ICP-AES).

### **Synthesis of surface dye-sensitized Pt/TiO<sub>2</sub>/Calix-3 materials.**

Pt nanoparticles were loaded on Gel-TiO<sub>2</sub> (or P25-TiO<sub>2</sub>) by a typical photo deposition method. In total, Gel-TiO<sub>2</sub> or P25-TiO<sub>2</sub> (150 mg), methanol (20 mL), 10

mM  $\text{H}_2\text{PtCl}_6$  aqueous solution (0.5 mL), and distilled water (80 mL) were added to a pyrex bottle, and then oxygen was removed from the bottle by vacuuming. The mixture was stirred and irradiated by a 300 W xenon lamp for 1 h. After centrifugation and washing with distilled water, the grey powder (denoted as Pt/Gel-TiO<sub>2</sub> or P25-TiO<sub>2</sub>, Pt deposited amount: 0.5 wt%) was dried at room temperature in a vacuum drying chamber. Then **Calix-3** was adsorbed onto Pt/gel-TiO<sub>2</sub> or Pt/P25-TiO<sub>2</sub> by stirring 50 mg TiO<sub>2</sub> powder in **Calix-3** solution (2  $\mu\text{mol}$  of dye dissolved in 10 ml tetrahydrofuran) at room temperature for 12 h in the dark. After centrifugation and washing with fresh tetrahydrofuran, the powder (denoted as Pt/Gel-TiO<sub>2</sub> or P25-TiO<sub>2</sub>/Calix-3) was dried at room temperature in a vacuum drying chamber. The concentrations of dye solutions before and after use were determined to be 2.87 wt% for Pt/Gel-TiO<sub>2</sub>/Calix-3 or 2.35 wt% for Pt/P25-TiO<sub>2</sub>/Calix-3 by UV-vis spectra at 408 nm wavelength to calculate the adsorbing capacities of the catalysts.

### **Characterizations.**

The <sup>1</sup>H and <sup>13</sup>C NMR spectra were recorded on a Bruker 400 MHz spectrometer. The absorption spectra were observed with a Shimadzu UV-3600 spectrometer and fluorescence spectra were measured with an Edinburgh Instruments Ltd FLS980 spectrometer. Powder X-ray diffraction (XRD) was recorded on a Rigaku Smart Lab diffractometer (Bragg-Brentano geometry, Cu-K $\alpha_1$  radiation,  $\lambda = 1.54056 \text{ \AA}$ ). Transmission electron microscopy (TEM) images, high-resolution transmission electron microscopy (HRTEM), selected area electron diffraction (SAED), and energy dispersive X-ray spectroscopy (EDX) elemental mapping were obtained by a JEM-2100F transmission electron microscope at 300 kV. Scanning electron microscope (SEM) micrographs were recorded on Hitachi Ultra-high Resolution FE-SEM SU8010 microscope. Gas adsorption measurements were performed using ultra-high purity N<sub>2</sub> and CO<sub>2</sub> gas on Quantachrome Auto-sorb-iQ2-MP analyzer. The Mott-Schottky curves were measured using a CHI760E electrochemical analyzer (China) in a three-electrode cell. Pt plate was used as counter electrode and Ag/AgCl electrode (3 M KCl) was used as reference electrode. The electrolyte was a 0.2 M Na<sub>2</sub>SO<sub>4</sub> solution. The working electrode was prepared on fluorine-doped tin oxide

(FTO) glass by dipping the mixed slurry containing the sample and H<sub>2</sub>O, and the exposed area of the electrode was 0.25 cm<sup>2</sup>. Cyclic voltammograms (CV) were recorded using a CHI-760E electrochemical workstation with platinum plate as working electrode, Ag/AgCl (3 M KCl) as reference electrode, Pt wire as counter electrode. CVs were measured using 0.1 M tetrabutylammonium hexafluorophosphate (TBAPF<sub>6</sub>) as a supporting electrolyte in CHCl<sub>3</sub> with a scan rate of 100 mV s<sup>-1</sup>. The photocatalytic hydrogen production system was Perfect Light Lab Solar-IIIAG and H<sub>2</sub> measurement was performed on Agilent Technologies 78. The amounts of Pt NPs were detected by ICP-AES (spectra range: 120-800 nm, holographic grating, 2924 line/mm, SPECTRO CIROS VISION). Attenuated total reflection Fourier transformed infrared (ATR-IR) spectra were monitored by Frontier FT-IR spectrometer (spectra range 4000-450 cm<sup>-1</sup>, an average of 64 scans). Electrochemical impedance spectra (EIS) and photocurrent-time (i-t) curves were obtained using a CHI-760E electrochemical workstation and a 300 W Xe lamp equipped with an electric shutter and an optical filter ( $\lambda > 420$  nm) to cut off the light in the ultraviolet region. The electrochemical cell used was equipped with three electrodes including a carbon bar counter-electrode, an Ag/AgCl reference electrode (3 M KCl) and a fluorin-doped tin oxide (FTO) glass functionalized with photocatalysts as working electrode. Na<sub>2</sub>SO<sub>4</sub> aqueous solution (0.5 M) was used as the supporting electrolyte. Specifically, EIS measurements were implemented with 10 mV amplitude sinusoidal perturbation in a scanning frequency range of 10<sup>-2</sup> - 10<sup>6</sup> Hz and an applied bias potential of 0.5 V (vs. Ag/AgCl) under illumination, while i-t curves were obtained with an applied bias potential of 0.5 V (vs. Ag/AgCl) under on-off switching illumination.

### **Photocatalytic hydrogen production.**

The photocatalytic hydrogen evolution by water splitting was performed in a glass reaction cell with quartz cover connected to a closed gas circulation, which was swept by high purity Ar before illumination. 50 mg photocatalysts were dispersed in 100 mL of 10 vol% TEOA aqueous solution (pH  $\approx$  12). Then the suspension was exposed to a 300 W Xe lamp equipped with an optical filter ( $\lambda > 420$  nm). The reaction solution

was stirred continuously and cooled to room temperature by a circulation of cooling water. The amount of hydrogen evolved was determined at an interval of 1 h with online gas chromatography.

#### **Determination of apparent quantum yield (AQY).**

The photocatalytic mixture was irradiated by an incident LED light source (Zolix, MLED4-1, M450L,  $\lambda = 450$  nm, light intensity  $100 \text{ mW cm}^{-2}$ , irradiating area  $0.8 \text{ cm}^2$ ) at  $20^\circ\text{C}$ . The number of incident photons was measured by a standard method using a  $\text{K}_3[\text{Fe}^{\text{III}}(\text{C}_2\text{O}_4)_3]$  actinometer and the photon flux was determined to be  $1083 \mu\text{mol h}^{-1}$ . The generated  $\text{H}_2$  gas was analyzed by an Agilent 7820A gas chromatography with a thermal conductivity detector (TCD).

AQY ( $\Phi$ ) was calculated according to the following equation:

$$\phi = \frac{\text{number of transferred electrons}}{\text{number of incident photons}} \times 100\% = \frac{n(\text{H}_2) \times 2}{n(\text{photons})} \times 100\%$$

#### **Reference**

1. L.-L. Tan, J.-M. Liu, S.-Y. Li, L.-M. Xiao, D.-B. Kuang, C.-Y. Su. *ChemSusChem*, 2015, **8**, 280.

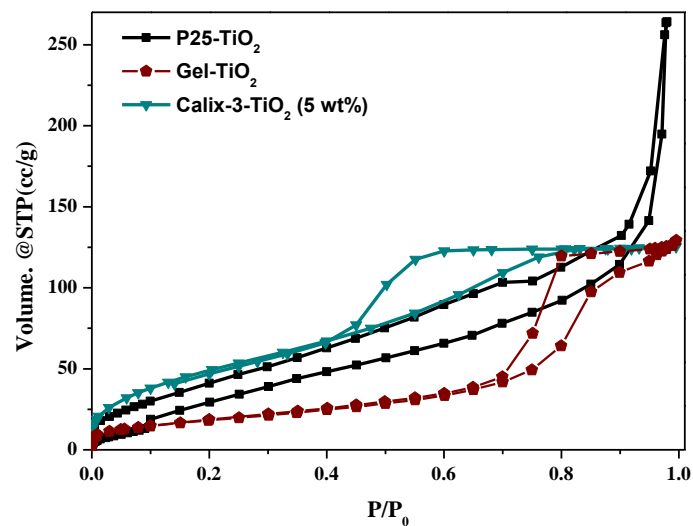

**Fig. S1.** N<sub>2</sub> adsorption-desorption isotherms of Calix-3-TiO<sub>2</sub> (5 wt%), Gel-TiO<sub>2</sub> and P25-TiO<sub>2</sub> measured under 77 K.

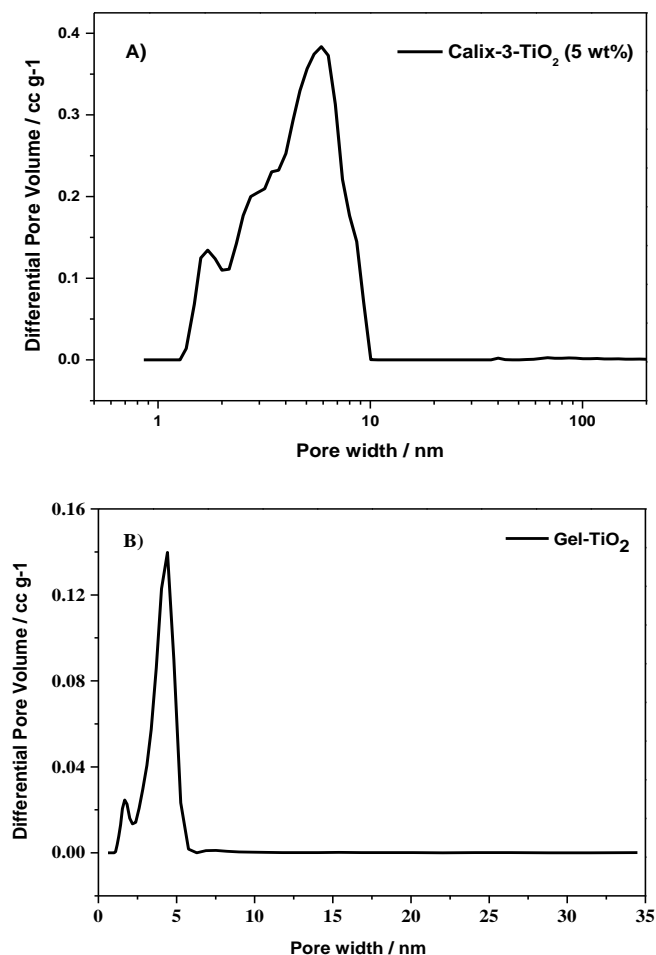

**Fig. S2.** The pore size distribution of A) Calix-3-TiO<sub>2</sub> (5 wt%) and B) Gel-TiO<sub>2</sub>.

**Table S1.** BET surface area, pore volume and pore width of Calix-3-TiO<sub>2</sub> (5 wt%), Gel-TiO<sub>2</sub> and P25-TiO<sub>2</sub> derived from 77 K N<sub>2</sub> sorption isotherms.

| Sample                             | Surface Area (m <sup>2</sup> /g) | Pore volume (ml/g) | Pore width (nm) |           |
|------------------------------------|----------------------------------|--------------------|-----------------|-----------|
|                                    |                                  |                    | mesopore        | micropore |
| P25-TiO <sub>2</sub>               | 55.4                             | 0.162              | 29.40           |           |
| Calix-3-TiO <sub>2</sub> (5.0 wt%) | 190.1                            | 0.202              | 5.88            | 1.71      |
| Gel-TiO <sub>2</sub>               | 162.9                            | 0.233              | 4.41            | 1.68      |

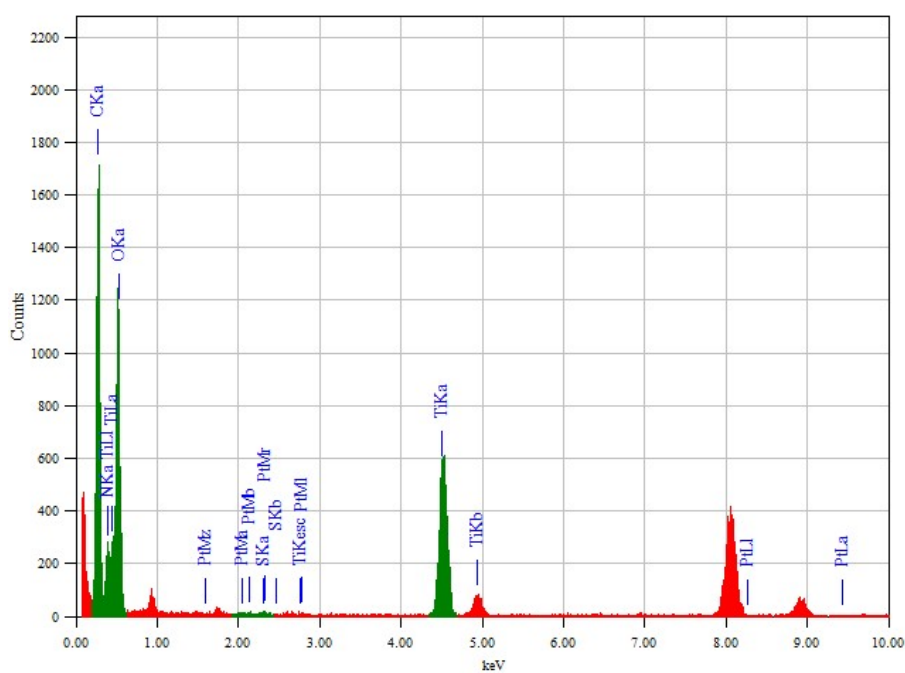

**Fig. S3.** EDX of Pt/Calix-3-TiO<sub>2</sub> (5 wt%).



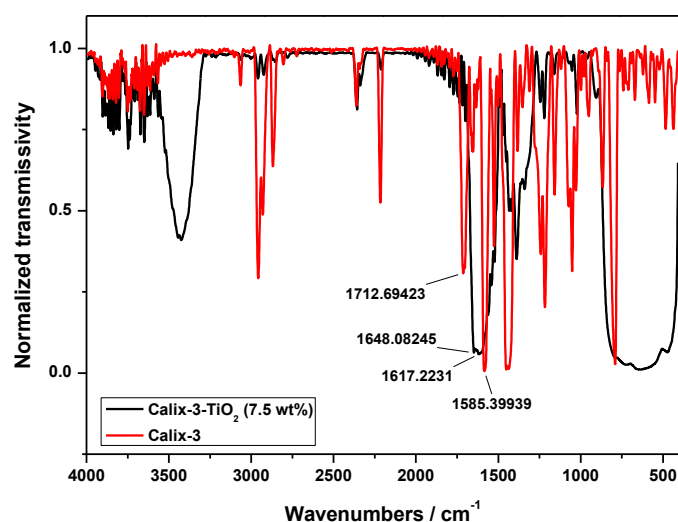

**Fig. S4.** ATR-IR spectra of **Calix-3** and Calix-3-TiO<sub>2</sub> (7.5 wt%).

**Table S2.** H<sub>2</sub> production data of Pt/Calix-3-TiO<sub>2</sub> with different dye content, Pt/Gel-TiO<sub>2</sub>/Calix-3 (2.87 wt%), and Pt/P25-TiO<sub>2</sub>/Calix-3 (2.35 wt%) materials.

| Materials                                   | Activity/                                           | Activity/                                                           | TON <sub>[Pt]</sub> (5 h) <sup>[c]</sup> TON <sub>[dye]</sub> (5 h) <sup>[d]</sup> |      |
|---------------------------------------------|-----------------------------------------------------|---------------------------------------------------------------------|------------------------------------------------------------------------------------|------|
|                                             | mmol g <sup>-1</sup> h <sup>-1</sup> <sup>[a]</sup> | mmol g <sup>-1</sup> <sub>[Pt]</sub> h <sup>-1</sup> <sup>[b]</sup> |                                                                                    |      |
| Pt/Calix-3-TiO <sub>2</sub> (1 wt%)         | 4.85                                                | 970                                                                 | 946                                                                                | 4881 |
| Pt/Calix-3-TiO <sub>2</sub> (2 wt%)         | 7.18                                                | 1437                                                                | 1401                                                                               | 3614 |
| Pt/Calix-3-TiO <sub>2</sub> (5 wt%)         | 10.36                                               | 2072                                                                | 2020                                                                               | 2084 |
| Pt/Calix-3-TiO <sub>2</sub> (7.5 wt%)       | 12.22                                               | 2444                                                                | 2384                                                                               | 1639 |
| Pt/Calix-3-TiO <sub>2</sub> (10 wt%)        | 11.29                                               | 2258                                                                | 2202                                                                               | 1136 |
| Pt/Gel-TiO <sub>2</sub> /Calix-3 (2.87 wt%) | 3.62                                                | 724                                                                 | 706                                                                                | 1269 |
| Pt/P25-TiO <sub>2</sub> /Calix-3 (2.35 wt%) | 2.09                                                | 418                                                                 | 407                                                                                | 895  |

[a] = (H<sub>2</sub> amount in 5 h/ total mass of catalysts) / 5 h

[b] = H<sub>2</sub> amount vs. Pt loading mass = [a] / Pt loading mass fraction = [a] / 0.005

[c] = H<sub>2</sub> amount vs. Pt loading amount = [b] × 5 × 195.05 / 1000

[d] = H<sub>2</sub> amount vs. dye loading amount = [a] × 5 × 0.001 × 2012<sup>[e]</sup> / corresponding dye loading mass fraction

[e] Molecular weight of Calix-3

**Table S3.** Performances of organic photosensitizers (PS) in photocatalytic H<sub>2</sub> production studies in recent years<sup>a</sup>

| No. | reference                                                | PS      | activity                  | TON <sub>[dye]</sub> | time |
|-----|----------------------------------------------------------|---------|---------------------------|----------------------|------|
| 1   | <i>ChemSusChem</i> , 2018, <b>11</b> , 793.              | AD418   | 4359 $\mu\text{mol/g}$    | 872 <sup>b</sup>     | 20 h |
| 2   | <i>Appl. Energy Mater.</i> , 2018, <b>1</b> , 2813.      | ChI+Ind | 4176 $\mu\text{mol/g}$    | 1044 <sup>b</sup>    | 6 h  |
| 3   | <i>Org. Lett.</i> , 2017, <b>19</b> , 1048.              | S1      | 63112 $\mu\text{mol/g}$   | 10200                | 48 h |
| 4   | <i>Susta. Energy Fuels</i> , 2017, <b>1</b> , 694.       | CBZ-Th  | 10083 $\mu\text{mol/g}$   | 2017                 | 20 h |
| 5   | <i>Int. J. Hydro. Energy</i> , 2017, <b>42</b> , 15731.  | ChI-2   | 1,580 $\mu\text{mol/g}$   | —                    | 6 h  |
| 6   | <i>Dyes Pigm.</i> , 2017, <b>139</b> , 7.                | YFT-2   | 10438 $\mu\text{mol/g}$   | 712 <sup>b</sup>     | 10 h |
| 7   | <i>Dyes Pigm.</i> , 2016, <b>134</b> , 498.              | D2      | 106,667 $\mu\text{mol/g}$ | 1640 <sup>b</sup>    | 16 h |
| 8   | <i>J. Mater. Chem. A</i> , 2015, <b>3</b> , 21713.       | C16     | 42,576 $\mu\text{mol/g}$  | 2930 <sup>b</sup>    | 20 h |
| 9   | <i>Int. J. Hydro. Energy</i> , 2015, <b>40</b> , 9069.   | DN5     | 93,200 $\mu\text{mol/g}$  | 1864 <sup>b</sup>    | 6 h  |
| 10  | <i>New J. Chem.</i> , 2015, <b>39</b> , 713.             | D2@NPT  | 566.9 $\mu\text{mol/g}$   | 10901                | 6 h  |
| 11  | <i>Phys. Chem. Chem. Phys.</i> , 2015, <b>17</b> , 13710 | DNPT    | 1208 $\mu\text{mol/g}$    | 9664                 | 10 h |

<sup>a</sup>Only the best performance in each study is listed.

<sup>b</sup>In the references, TON values were calculated by the equal:  $\text{TON} = (2 \times \text{amount of H}_2) / \text{amount of dye}$ .

**Table S4.** H<sub>2</sub> production and AQY results of Calix-3-TiO<sub>2</sub> after 1h irradiation under 450 nm LED light source.

| photocatalyst                         | n(H <sub>2</sub> ) / $\mu\text{mol}$ | AQY / % |
|---------------------------------------|--------------------------------------|---------|
| Pt/Calix-3/P25-TiO <sub>2</sub>       | 2.02                                 | 0.37    |
| Pt/Calix-3/Gel-TiO <sub>2</sub>       | 3.40                                 | 0.63    |
| Pt/Calix-3-TiO <sub>2</sub> (1 wt%)   | 4.45                                 | 0.82    |
| Pt/Calix-3-TiO <sub>2</sub> (2 wt%)   | 8.63                                 | 1.59    |
| Pt/Calix-3-TiO <sub>2</sub> (5 wt%)   | 12.70                                | 2.34    |
| Pt/Calix-3-TiO <sub>2</sub> (7.5 wt%) | 15.67                                | 2.89    |
| Pt/Calix-3-TiO <sub>2</sub> (10 wt%)  | 13.14                                | 2.43    |

**Table S5.** Cyclic H<sub>2</sub> production data of Calix-3-TiO<sub>2</sub> (7.5 wt%) hybrid material.

| Cycle | Activity<br>/mmol g <sup>-1</sup> h <sup>-1</sup> [a] | Cumulative                                          | Cumulative                                                          | TON <sub>[Pt]</sub> <sup>[d]</sup> | TON <sub>[dye]</sub> <sup>[e]</sup> |
|-------|-------------------------------------------------------|-----------------------------------------------------|---------------------------------------------------------------------|------------------------------------|-------------------------------------|
|       |                                                       | hydrogen<br>production/<br>mmol g <sup>-1</sup> [b] | hydrogen<br>production/<br>mmol g <sup>-1</sup> [Pt] <sup>[c]</sup> |                                    |                                     |
| 1st   | 12.22                                                 | 61.10                                               | 12221                                                               | 2384                               | 1639                                |
| 2nd   | 12.30                                                 | 122.60                                              | 24521                                                               | 4783                               | 3289                                |
| 3rd   | 12.27                                                 | 183.94                                              | 36788                                                               | 7176                               | 4935                                |
| 4th   | 12.51                                                 | 246.49                                              | 49297                                                               | 9615                               | 6612                                |
| 5th   | 12.72                                                 | 310.09                                              | 62018                                                               | 12097                              | 8319                                |
| 6th   | 12.81                                                 | 374.12                                              | 74825                                                               | 14595                              | 10036                               |
| 7th   | 13.04                                                 | 439.33                                              | 87867                                                               | 17138                              | 11786                               |
| 8th   | 12.72                                                 | 502.94                                              | 100588                                                              | 19620                              | 13492                               |
| 9th   | 13.30                                                 | 569.45                                              | 113891                                                              | 22214                              | 15277                               |
| 10th  | 12.30                                                 | 630.97                                              | 126193                                                              | 24614                              | 16927                               |

[a] = (H<sub>2</sub> amount in 5 h/ total mass of catalysts) / 5 h

[b] Previous total hydrogen production

[c] H<sub>2</sub> amount vs. Pt loading mass = [b] / Pt loading mass fraction = [a] / 0.005

[d] H<sub>2</sub> amount vs. Pt loading amount = [c] \*195.05 / 1000

[e] = H<sub>2</sub> amount vs. dye loading amount = [c] ×0.001 × 2012<sup>[f]</sup> / 0.075

[f] Molecular weight of Calix-3

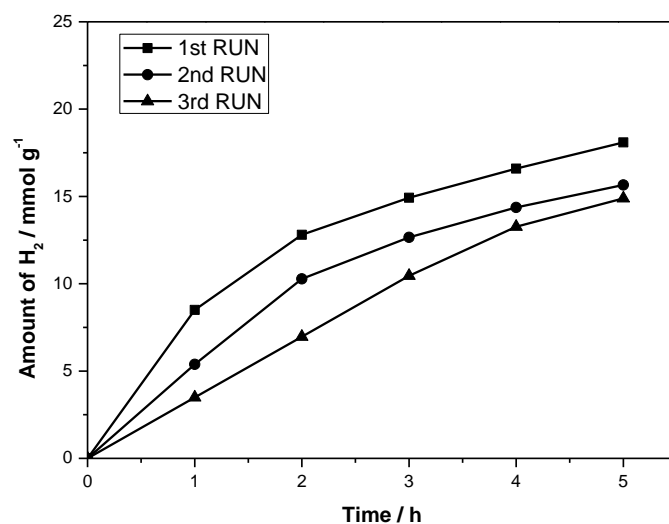

**Fig. S5.** Photocatalytic H<sub>2</sub> production over the recyclability of Gel-TiO<sub>2</sub>/Calix-3 (2.87 wt%) with 0.5 wt% Pt loading under visible light irradiation ( $\lambda > 420$  nm) in 100 mL H<sub>2</sub>O/TEOA (9:1, v/v).

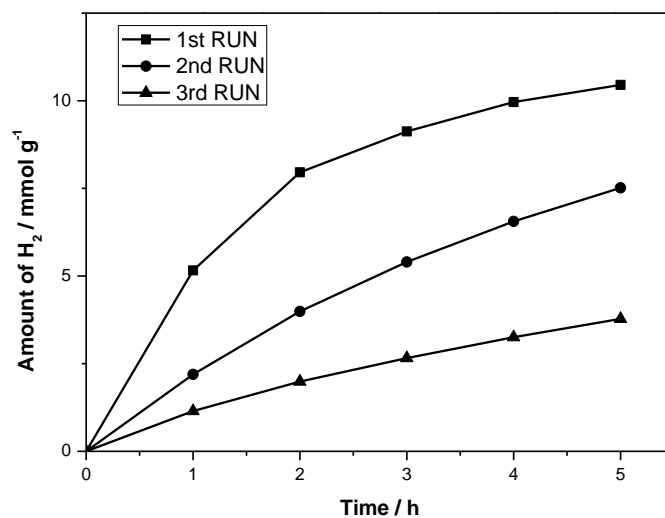

**Fig. S6.** Photocatalytic H<sub>2</sub> production over the recyclability of P25-TiO<sub>2</sub>/Calix-3 (2.35 wt%) with 0.5 wt% Pt loading under visible light irradiation ( $\lambda > 420$  nm) in 100 mL H<sub>2</sub>O/TEOA (9:1, v/v).

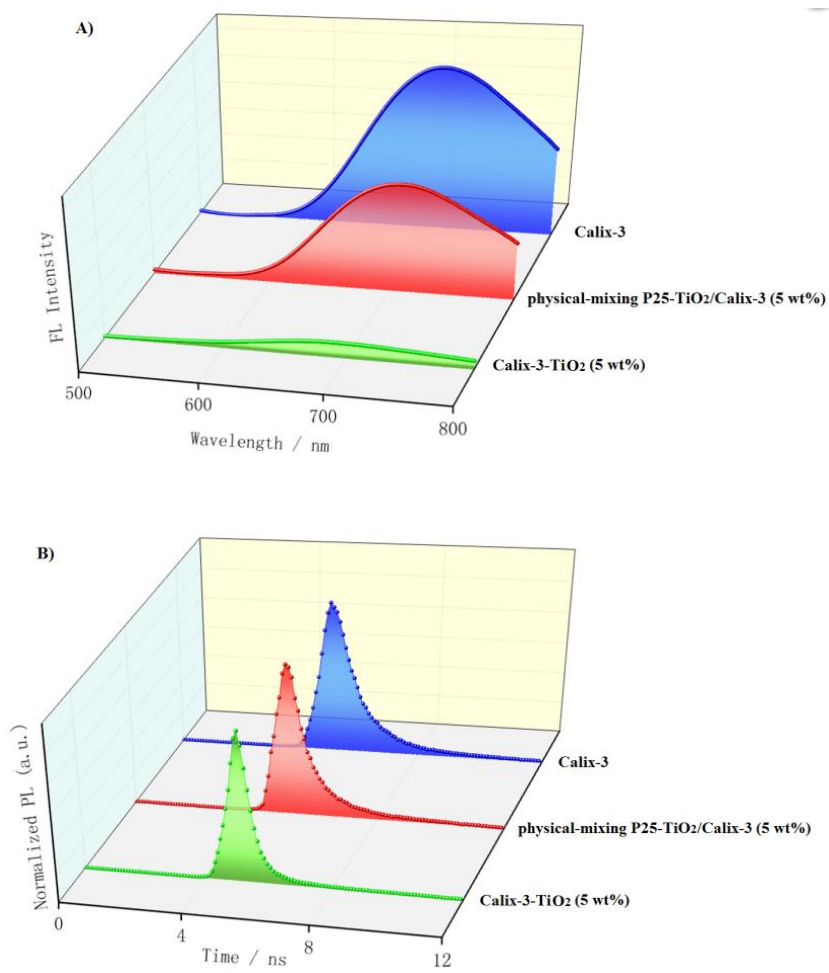

**Fig. S7.** A) Emission spectra and B) photoluminescence decays of **Calix-3**, physical-mixing P25-TiO<sub>2</sub>/Calix-3 (5 wt%), and Calix-3-TiO<sub>2</sub> (5 wt%).
